# Supplementary material for: Identification of Quality Markers in Schisandra chinensis (Turcz.) Baill. Using UPLC-Q-Extractive Orbitrap/MS, Chemometric Analysis, and Network Pharmacology
Source: MDPI journal article supplement (doi:10.3390/separations11030088), 2024-03-18
Supplement: s1 [file s1]

## **Supplementary Materials**

# **Identification of Quality Markers in *Schisandra chinensis* (Turcz.) Baill. using UPLC-Q-Extractive Orbitrap/MS, Chemometrics Analysis, and Network Pharmacology**

Yin-Peng Wang<sup>1</sup>, Yu-Mei Li<sup>2</sup>, Yan Ding<sup>1</sup>, Xin-Xin Du<sup>1</sup>, and Jing-Bo Zhu<sup>1\*</sup>

### **Affiliation:**

<sup>1</sup> School of Food Science and Technology, Dalian Polytechnic University, Dalian 116034, China

<sup>2</sup> Department of Clinical Pharmacy and Traditional Chinese Medicine Pharmacology, School of Pharmaceutical Sciences, Changchun University of Chinese Medicine, Changchun 130117, China

### **Correspondence:**

Professor Jingbo Zhu, School of Food Science and Technology, Dalian Polytechnic University,

Add.: No. 1 Qinggong Road, Ganjingzi District, Dalian, 116034, China.

Email: zhujb@dlpu.edu.cn;

Tel: +86-411-86323656

## Supplementary Figures

1. FIGURE S1 TIC overlapping map of QC samples mass spectrometry results. (A) positive ion mode and (B) negative ion mode.
2. FIGURE S2 Representative base peak intensity chromatograms of samples of *S chinensis* derived from UPLC-Q-Extractive Orbitrap/MS. Diagram of samples with different harvesting times in positive (A) and negative (B) modes.

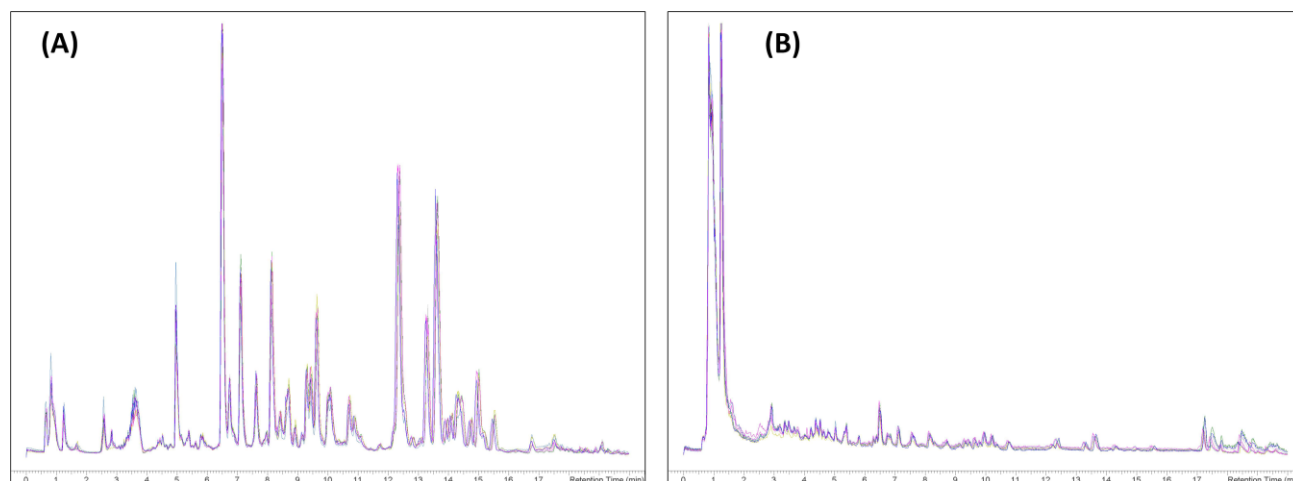

**FIGURE S1** TIC overlapping map of QC samples mass spectrometry results. (A) positive ion mode; (B) negative ion mode.

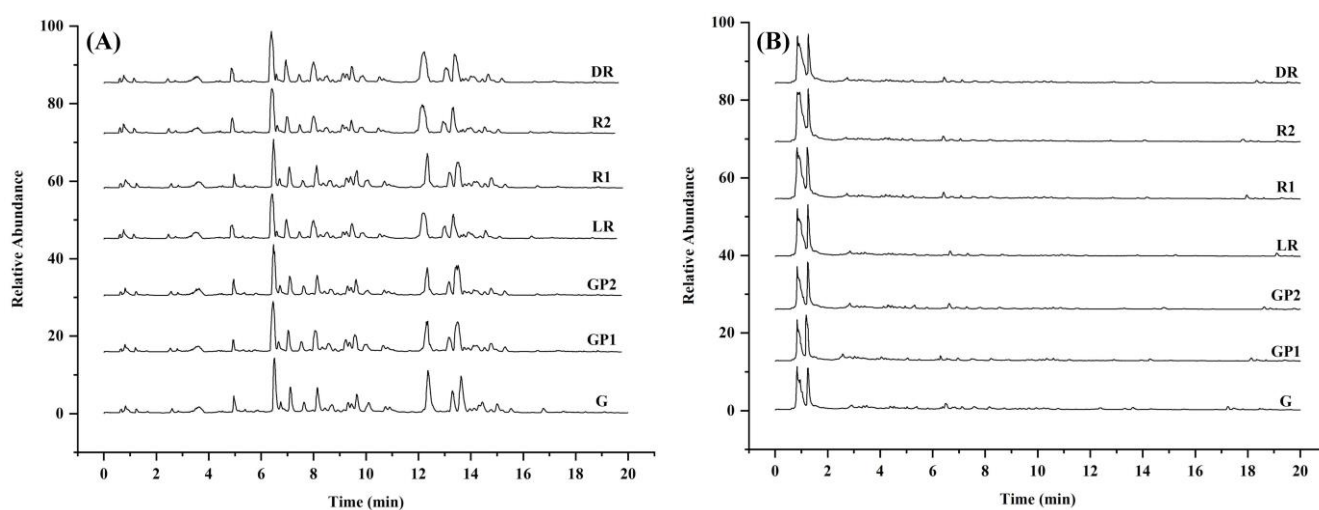

**FIGURE S2** Representative base peak intensity chromatograms of samples of *S chinensis* derived from UPLC-Q-Extractive Orbitrap/MS. Diagram of samples with different harvesting times in positive (A) and negative (B) modes.

## Supplementary Tables

1. TABLE S1 Collecting information of seven batches of *S. chinensis*.
2. TABLE S2 Adsorption, distribution, metabolism, and exclusion (ADME) characteristic information of 36 compounds from *S. chinensis*.
3. TABLE S3 Characteristic information of 13 potential targets of *S. chinensis* for hepatoprotective.
4. TABLE S4 Molecular docking of lignans binding with targets and their binding energy.
5. TABLE S5 Regression equation, linear range, LOD, LOQ, repeatability, precision, and recoveries of six analyte.

**TABLE S1** Collecting information of seven batches of *S. chinensis*

| Sample No. | Source                                 | Harvesting time    | Reference No.   |
|------------|----------------------------------------|--------------------|-----------------|
| G          | Baoshan Town, Liaoning Province, China | July 21, 2021      | DPU-SC2021-0721 |
| GP1        | Baoshan Town, Liaoning Province, China | August 1, 2021     | DPU-SC2021-0801 |
| GP2        | Baoshan Town, Liaoning Province, China | August 12, 2021    | DPU-SC2021-0812 |
| LR         | Baoshan Town, Liaoning Province, China | August 23, 2021    | DPU-SC2021-0823 |
| R1         | Baoshan Town, Liaoning Province, China | September 4, 2021  | DPU-SC2021-0904 |
| R2         | Baoshan Town, Liaoning Province, China | September 15, 2021 | DPU-SC2021-0915 |
| DR         | Baoshan Town, Liaoning Province, China | September 26, 2021 | DPU-SC2021-0926 |

**TABLE S2** Adsorption, distribution, metabolism, and exclusion (ADME) characteristic information of 36 identified compounds from *S. chinensis*

| No. | Compound               | PubChem CID | MW (g/mol) | GI absorption  | OB (%) | DL   |
|-----|------------------------|-------------|------------|----------------|--------|------|
| 1   | Phenprobamate          | 4770        | 179.2      | + <sup>a</sup> | 2.42   | 0.04 |
| 2   | Micrandilactone D      | 101740771   | 560.6      | — <sup>b</sup> | 9.53   | 0.16 |
| 3   | Henridilactone D       | 137347703   | 544.6      | +              | 23.33  | 0.30 |
| 4   | Gomisin H              | 5317803     | 418.5      | +              | 7.88   | 0.62 |
| 5   | Lancifodilactone D     | 12080814    | 526.6      | +              | 29.24  | 0.16 |
| 6   | Schisandrol A          | 23915       | 432.5      | +              | 7.69   | 0.66 |
| 7   | Gomisin D              | 75130910    | 530.6      | +              | 7.88   | 0.59 |
| 8   | Gomisin J              | 3001686     | 388.5      | +              | 8.41   | 0.54 |
| 9   | Schisandrol B          | 634470      | 416.5      | +              | 28.52  | 0.78 |
| 10  | Angeloylgomisin H      | 26204131    | 500.6      | +              | 7.51   | 0.81 |
| 11  | Tigloylgomisin H       | 5318766     | 500.6      | +              | 22.28  | 0.17 |
| 12  | Benzoylgomisin Q       | 14605164    | 552.6      | +              | 7.5    | 0.85 |
| 13  | Gomisin G              | 14992067    | 536.6      | +              | 32.68  | 0.83 |
| 14  | Angeloylgomisin P      | 13844273    | 514.6      | +              | 30.71  | 0.83 |
| 15  | Gomisin K <sub>1</sub> | 78385003    | 402.5      | +              | 8.01   | 0.58 |
| 16  | Gomisin F              | 51003489    | 514.6      | +              | 7.52   | 0.83 |
| 17  | Schisantherin A        | 151529      | 536.6      | +              | 7.56   | 0.81 |
| 18  | Schisantherin B        | 6438572     | 514.6      | +              | 31.99  | 0.83 |
| 19  | Schisanhenol           | 73057       | 402.5      | +              | 8.02   | 0.59 |
| 20  | Gomisin M <sub>2</sub> | 14992068    | 386.4      | +              | 17.13  | 0.70 |
| 21  | Gomisin E              | 78385000    | 514.6      | +              | 8.15   | 0.62 |
| 22  | Gomisin L <sub>1</sub> | 5317806     | 386.4      | +              | 9.38   | 0.71 |

|    |                            |           |       |   |       |      |
|----|----------------------------|-----------|-------|---|-------|------|
| 22 | Gomisin L <sub>2</sub>     | 5317807   | 386.4 | + | 9.13  | 0.71 |
| 23 | Schisandrin A              | 155256    | 416.5 | + | 8.3   | 0.55 |
| 24 | Gomisin N                  | 158103    | 400.5 | + | 18.53 | 0.74 |
| 25 | Schisandrin B              | 108130    | 400.5 | + | 20.16 | 1.01 |
| 26 | Schisandrin C              | 119112    | 384.4 | + | 46.27 | 0.84 |
| 27 | Benzoylgomisin O           | 91826818  | 520.6 | + | 7.59  | 0.85 |
| 28 | Quinic acid                | 6508      | 192.2 | — | 63.53 | 0.06 |
| 29 | Citric acid                | 311       | 192.1 | — | 56.22 | 0.05 |
| 30 | 1-O-caffeoylquinic acid    | 10155076  | 354.3 | — | 22.94 | 0.80 |
| 31 | Procyanidin B <sub>1</sub> | 11250133  | 578.5 | — | 67.87 | 0.66 |
| 32 | 3-O-p-coumaroylquinic acid | 9945785   | 338.3 | — | 37.63 | 0.29 |
| 33 | 5-O-p-coumaroylquinic acid | 274614191 | 338.3 | — | 20.41 | 0.28 |
| 34 | Rutin                      | 5280805   | 610.5 | — | 3.2   | 0.68 |
| 35 | Quercetin-3-O-glucoside    | 5280804   | 464.4 | — | 1.86  | 0.77 |
| 36 | Kaempferol-3-O-glucoside   | 5282102   | 448.4 | — | 14.03 | 0.74 |

Note: <sup>a</sup> Well-absorbed, polar surface area (PSA) lower than 142 Å<sup>2</sup> and n-octanol/water partition coefficient (log *P*) between −2.3 and +6.8; <sup>b</sup> poorly-absorbed. Abbreviation: MW, molecular weight (g/mol); GI absorption, gastrointestinal absorption; OB, oral bioavailability; DL, drug-likeness property.

**TABLE S3** Characteristic information of 13 potential targets of *S chinensis* for hepatoprotective

| No. | Protein Name                                                                   | Gene Symbol | Uniprot ID |
|-----|--------------------------------------------------------------------------------|-------------|------------|
| 1   | Tyrosine-protein kinase ABL1                                                   | ABL1        | P00519     |
| 2   | RAC-alpha serine/threonine-protein kinase                                      | AKT1        | P31749     |
| 3   | Serine/threonine-protein kinase ATR                                            | ATR         | Q13535     |
| 4   | Serine/threonine-protein kinase B-raf                                          | BRAF        | P15056     |
| 5   | Prothrombin                                                                    | F2          | P00734     |
| 6   | Tyrosine-protein kinase JAK2                                                   | JAK2        | O60674     |
| 7   | Leucine-rich repeat serine/threonine-protein kinase 2                          | LRRK2       | Q5S007     |
| 8   | Mitogen-activated protein kinase 14                                            | MAPK14      | Q16539     |
| 9   | Mitogen-activated protein kinase 8                                             | MAPK8       | P45983     |
| 10  | Hepatocyte growth factor receptor                                              | MET         | P08581     |
| 11  | Poly [ADP-ribose] polymerase 1                                                 | PARP1       | P09874     |
| 12  | Phosphatidylinositol 4,5-bisphosphate 3-kinase catalytic subunit alpha isoform | PIK3CA      | P42336     |
| 13  | Prostaglandin G/H synthase 2                                                   | PTGS2       | P35354     |

**TABLE S4** Molecular docking of lignans binding with target and their binding energy.

| Compound No.     | Name            | Affinity (kcal/mol)  |
|------------------|-----------------|----------------------|
|                  |                 | PIK3CA (PDBID: 4JPS) |
| 18               | Schisantherin B | −8.5                 |
| 26               | Schisandrin C   | −8.4                 |
| Positive control | DDB             | −7.7                 |

**TABLE S5** Regression equation, linear range, LOD, LOQ, precision, and repeatability of six analytes

| No. | Analyte           | Calibration curve      | R <sup>2</sup> | Linear range<br>(µg/mL) | LOD<br>(µg/mL) | LOQ<br>(µg/mL) | Repeatability<br>(RSD%) | Precision (RSD%) |           |
|-----|-------------------|------------------------|----------------|-------------------------|----------------|----------------|-------------------------|------------------|-----------|
|     |                   |                        |                |                         |                |                |                         | Intra-day        | Inter-day |
| 6   | Schisandrol A     | $Y = 40.889X + 231.88$ | 0.9980         | 34.5 – 230              | 0.23           | 1.15           | 1.95                    | 0.84             | 1.72      |
| 10  | Angeloylgomisin H | $Y = 30.497X - 78.97$  | 0.9980         | 10.5 – 52.5             | 0.35           | 0.70           | 2.74                    | 0.57             | 2.30      |
| 17  | Schisantherin A   | $Y = 24.533X - 19.184$ | 0.9990         | 4 – 40                  | 0.40           | 1.20           | 2.12                    | 0.59             | 1.56      |
| 18  | Schisantherin B   | $Y = 22.105X + 14.601$ | 0.9990         | 4.5 – 31.5              | 0.45           | 1.35           | 1.75                    | 0.49             | 1.76      |
| 23  | Schisandrin A     | $Y = 36.620X - 2.0303$ | 0.9998         | 1.7 – 25.5              | 0.17           | 0.85           | 1.83                    | 0.52             | 1.73      |
| 26  | Schisandrin C     | $Y = 18.084X - 2.3635$ | 0.9997         | 3.5 – 14                | 0.14           | 0.70           | 2.25                    | 0.65             | 2.13      |
